# Supplementary material for: Dietary peptides from the non-digestible fraction of Phaseolus vulgaris L. decrease angiotensin II-dependent proliferation in HCT116 human colorectal cancer cells through the blockade of the renin–angiotensin system
Source: Royal Society of Chemistry journal article supplement (doi:10.1039/c6fo00093b), 2016-01-01
Supplement: c6fo00093b1.pdf [file c6fo00093b1.pdf]

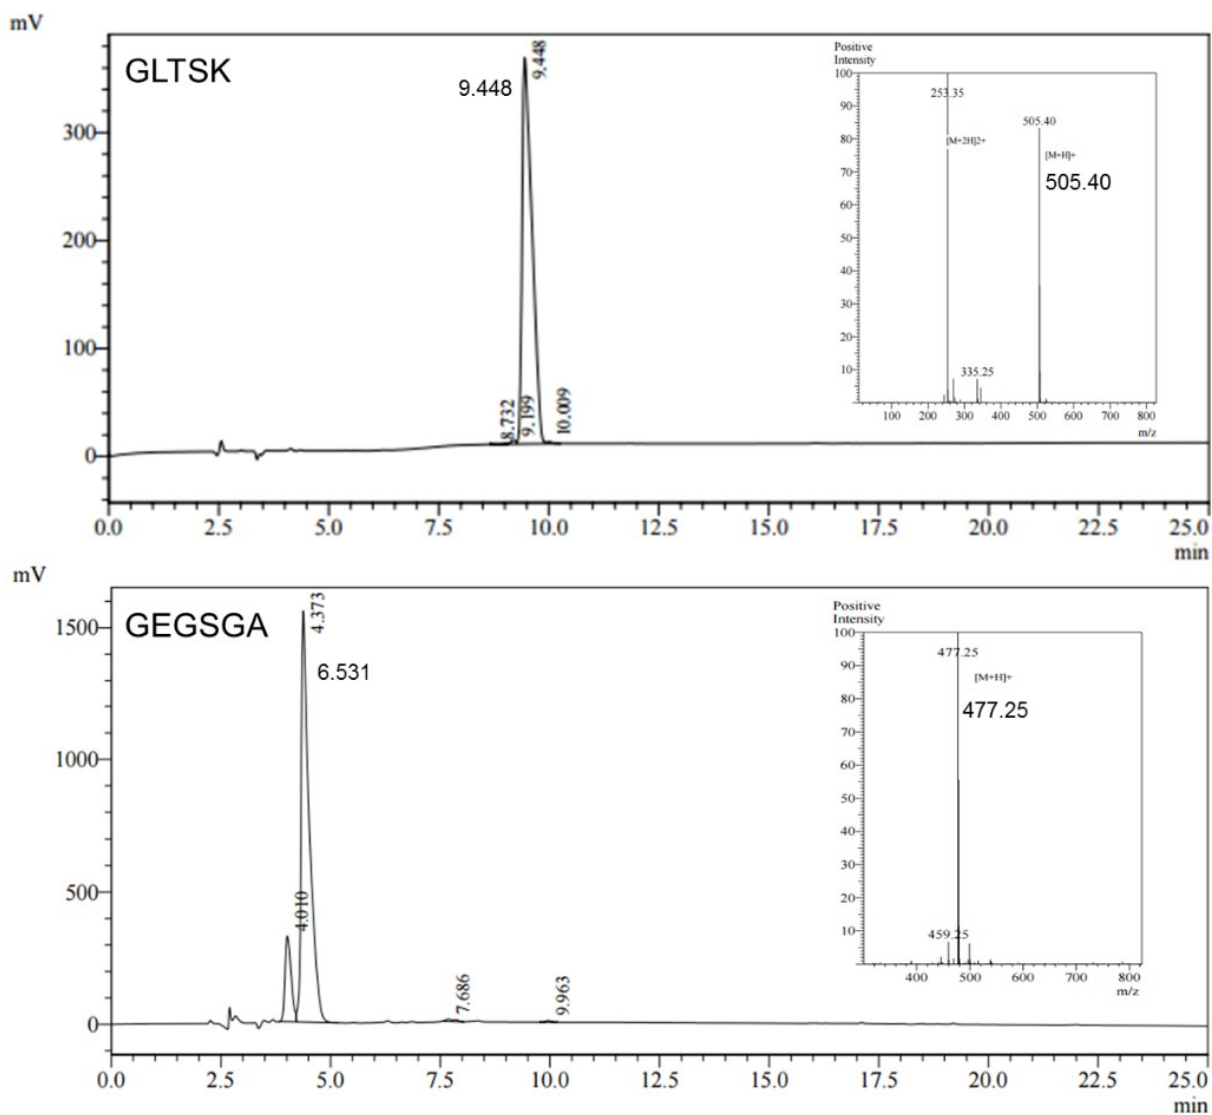

**Supplemental Figure 1:** Chromatograms (left) and mass/mass spectra (right) of pure peptides originally found in NDF of common bean.
